# Supplementary material for: The Structural Evolution and Mechanical Properties of Semi-Aromatic Polyamide 12T after Stretching
Source: MDPI journal article supplement (doi:10.3390/polym14224805), 2022-11-08
Supplement: s1 [file s1]

**Table S1.** Mechanical properties of different polyamides.

| Samples                        | Tensile strength (MPa) |
|--------------------------------|------------------------|
| PA12T                          | 95 [1]                 |
| PA12T film                     | 77                     |
| PA12T uniaxially oriented film | 466                    |
| PA9T                           | 92 [1]                 |
| PA6                            | 75 [54]                |
| PA11                           | 46 [55]                |
| PA12                           | 44 [56]                |
| PA66                           | 72 [57]                |
| PA1010                         | 46 [58]                |
| PA1212                         | 54 [59]                |
